# Supplementary material for: A standardized system and App for continuous patient symptom logging in gastroduodenal disorders: design, implementation, and validation
Source: bioRxiv or medRxiv preprint supplement (doi:10.1101/2021.09.06.21263001), 2021-09-12
Supplement: Supplementary file [file media-1.pdf]

Table 1: Participant Clinical and Demographic Characteristics.

| <b>Characteristic</b>                                            | <b>FD<br/>(n=10)</b> | <b>CNVS or<br/>Gastroparesis<br/>(n = 42)</b> | <b>Scintigraphy<br/>(n = 27)</b> | <b>Total Sample<br/>(N=79)</b> |
|------------------------------------------------------------------|----------------------|-----------------------------------------------|----------------------------------|--------------------------------|
| <b>Age</b> (years; <i>median</i> )<br>(IQR)                      | 51 (32-64)           | 34 (26-44)                                    | 45 (31-56)                       | 41 (27-52)                     |
| <b>Female, n (%)</b>                                             | 9 (90)               | 37 (88)                                       | 19 (70)                          | 65 (82)                        |
| <b>Ethnicity, n (%)</b>                                          |                      |                                               |                                  |                                |
| Caucasian                                                        | 9 (90)               | 31 (74)                                       | 16 (59)                          | 56 (71)                        |
| Māori                                                            | 0 (0)                | 3 (7)                                         | 4 (15)                           | 7 (9)                          |
| Chinese                                                          | 1 (10)               | 1 (2)                                         | 1 (4)                            | 3 (4)                          |
| Pasifika                                                         | 0 (0)                | 1 (2)                                         | 1 (4)                            | 2 (3)                          |
| Indian                                                           | 0 (0)                | 1 (2)                                         | 1 (4)                            | 2 (3)                          |
| Other                                                            | 0 (0)                | 5 (12)                                        | 4 (15)                           | 9 (11)                         |
| <b>BMI</b> (kgm <sup>2</sup> ) <i>mean</i><br>(Std) <sup>a</sup> | 22.6 (4.8)           | 24.1 (4.4)                                    | 24.0 (4.5)                       | 23.9 (4.5)                     |
| <b>Comorbidities,<br/>n (%)</b>                                  |                      |                                               |                                  |                                |
| Diabetes                                                         | 1(10)                | 5 (12)                                        | 1 (4)                            | 7 (9)                          |
| Hypo/Hyper-<br>thyroidism                                        | 1(10)                | 0 (0)                                         | 1 (4)                            | 2 (3)                          |
| Cardio-<br>Respiratory                                           | 1(10)                | 8 (19)                                        | 6 (22)                           | 15 (19)                        |
| IBS                                                              | 1(10)                | 7 (17)                                        | 5 (19)                           | 13 (16)                        |
| Anxiety /<br>Depression / PTSD                                   | 2 (20)               | 16 (38)                                       | 3 (11)                           | 21 (27)                        |

Table 1 continued

Table 1 Continued

| <b>Characteristic</b>                     | <b>FD (only)<br/>(n=10)</b> | <b>CNVS or<br/>Gastroparesis<br/>(n = 42)</b> | <b>Scintigraphy<br/>(n = 27)</b> | <b>Total Sample<br/>(n=79)</b> |
|-------------------------------------------|-----------------------------|-----------------------------------------------|----------------------------------|--------------------------------|
| <b>PAGI-SYM Score</b><br><i>Mdn</i> (IQR) | 1.23<br>(1.03 - 1.73)       | 2.45<br>(1.83 – 3.30)                         | 2.60<br>(1.40 - 3.45)            | 2.40<br>(1.50 - 3.30)          |
| <b>PAGI-QOL Score</b><br><i>Mdn</i> (IQR) | 3.34<br>(2.74 - 4.39)       | 2.68<br>(1.82- 3.44)                          | 3.50<br>(2.40 - 3.80)            | 2.86<br>(2.03 - 3.71)          |
| <b>GCSI Score</b><br><i>Mdn</i> (IQR)     | 1.71<br>(1.31 - 2.47)       | 3.17<br>(2.52 – 3.67)                         | 2.83<br>(2.08 - 3.64)            | 2.83<br>(2.06-3.64)            |

Note: BMI = Body Mass Index; IBS = Irritable Bowel Syndrome; PTSD = post-traumatic stress disorder; GCSI = Gastroparesis Cardinal Symptom Index.
