# Supplementary material for: A standardized system and App for continuous patient symptom logging in gastroduodenal disorders: design, implementation, and validation
Source: bioRxiv or medRxiv preprint supplement (doi:10.1101/2021.09.06.21263001), 2021-09-12
Supplement: Supplementary file [file media-2.pdf]

### Supplementary Table 1

Examples of patient responses to the symptom pictograms and recommendations for improvement.

| Intended Symptom     | Examples of Participant Feedback to Pictogram                                                                                                                                            |
|----------------------|------------------------------------------------------------------------------------------------------------------------------------------------------------------------------------------|
| Belching             | "...belching kind of thing"<br><br>"It's a difficult one to actually image without changing the person's shape"                                                                          |
| Excessive Fullness   | "stomach heaviness"<br><br>"maybe the feeling full, the stomach full and, maybe, you know, arrows pushing out to be like, you know, it's full"                                           |
| Heartburn            | "heartburn and acid going up through the back of your throat"<br><br>"Bad fit"                                                                                                           |
| Nausea               | "... that 'yuck' flushing feeling that you get when you're feeling nauseous"<br><br>"I'd probably do a squiggly line as opposed to a circle-y line, that is probably more like hypnosis" |
| Reflux               | "Vomiting slash maybe kind of reflux-y again"<br><br>"Maybe change the colour? Of the stomach?"                                                                                          |
| Upper Abdominal Pain | "I suppose that is abdo[minal] pain or yeah, a bit of a burning sensation in your stomach maybe"                                                                                         |
| Vomiting             | "Definitely vomiting"<br>"vomiting. That is kind of obvious"                                                                                                                             |
| Bloating             | "There's a balloon, so it's obviously bloating"<br>"... [the balloon should be] inside [the stomach]. I think that would be better yeah"                                                 |

(Supplementary Table 1 continued)

(Supplementary Table 1 continued)

| Intended Symptom | Examples of Participant Feedback to Pictogram                                                                                                                                                                                                                                                                                                                                                                                                           |
|------------------|---------------------------------------------------------------------------------------------------------------------------------------------------------------------------------------------------------------------------------------------------------------------------------------------------------------------------------------------------------------------------------------------------------------------------------------------------------|
| Early Satiety    | <p data-bbox="512 271 890 304">“Restricted or tight stomach”</p> <p data-bbox="512 344 1358 450">“The picture is a little harder than the other ones.... wording is a little harder than the other ones...and the combination of the two might miss some people”</p> <p data-bbox="512 479 1310 584">“I don’t know how you would make a picture better than that one...maybe changing the wording might help people understand the picture better?”</p> |
